# Supplementary material for: Prognostic Impacts of Comorbid Significant Coronary Stenosis and Coronary Artery Spasm in Patients With Stable Coronary Artery Disease
Source: PubMed Central journal article supplement — J Am Heart Assoc. 2021 Jan 16;10(2):e017831. doi: 10.1161/JAHA.120.017831 (PMC7955295; doi:10.1161/jaha.120.017831), 2021-01-16
Supplement: JAH3-10-e017831-s001.pdf [file JAH3-10-e017831-s001.pdf]

# **Supplemental Material**

**Figure S1. Incidence of MACE and Hazard Ratio in the 4 Clinical Groups.**

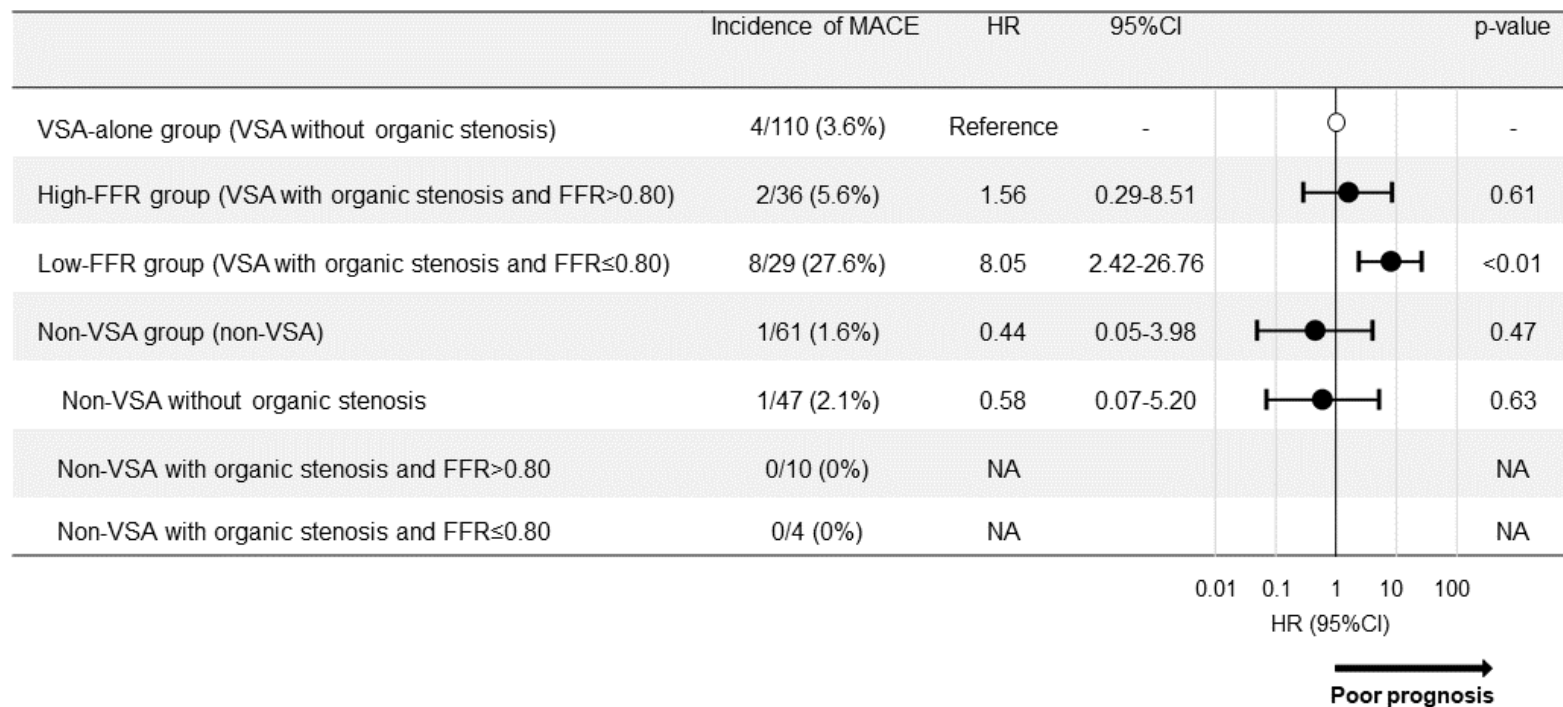

Low-FFR group (VSA with organic stenosis and  $FFR \leq 0.80$ ) had significantly worse prognosis as compared with VSA-alone group, and the prognosis of High-FFR and Non-VSA groups was comparable with VSA-alone group. In contrast, in Non-VSA group, irrespective of FFR value ( $FFR > 0.80$  or  $\leq 0.80$ ), patients with organic stenosis had no MACE during follow-up. CI indicates confidence interval; FFR, fractional flow reserve; HR, hazard ratio; MACE, major adverse cardiac event; and VSA, vasospastic angina.
